# Supplementary material for: Validation of chemometric-assisted single-drop microextraction based on sustainable solvents to analyze polyaromatic hydrocarbons in water samples
Source: Royal Society of Chemistry journal article supplement (doi:10.1039/d0ay01881c), 2020-12-10
Supplement: d0ay01881c1.pdf [file d0ay01881c1.pdf]

## *Electronic Supplementary Material*

### **Validation of chemometric-assisted single-drop microextraction based on sustainable solvents to analyze PAHs in water samples**

Amir Mehravar, Alireza Feizbakhsh, Amir Hosein Mohsen Sarafi, Elaheh Konoz, Hakim Faraji

<sup>a</sup> *Department of Chemistry, Central Tehran Branch, Islamic Azad University, Tehran, Iran*

<sup>b</sup> *Department of Chemistry, Varamin-Pishva Branch, Islamic Azad University, Varamin 338177489, Iran*

Corresponding authors: Hakim Faraji (Ph.D.)

Tel: 0098-36226954,

Fax: 0098-36224767,

Postal address: Naghsh-e-Jahan Sq., 338177489, Pishva, Varamin, Iran,

E-mail: hakimfaraji@yahoo.com,

ORCID iD: [orcid.org/0000-0002-1236-0746](https://orcid.org/0000-0002-1236-0746).

## 1. Characterization of selected DES

The interactions between the two components resulting in the formation of DES were clarified by recording FT-IR spectra. The synthesis of deep eutectic solvents is achieved by forming hydrogen bonds between choline chloride (ChCl) and oxalic acid (OX), which playact the role of hydrogen bond acceptor (HBA) and hydrogen bond donor (HBD), respectively (Fig. S2). Fig. 2 displays the FT-IR spectra of pure OX, ChCl versus DES consisting of them. The characteristic peaks of OX at 1708, 1438, 1310, 1230, 1218, and 1129  $\text{cm}^{-1}$  and peaks of ChCl at 1632, 1478, 1406, 1092, and 949  $\text{cm}^{-1}$  can also be observed in the DES. The peaks of OH groups from ChCl and OX are shifted and broaden due to the formation of H-bonding in the DES. The frequency at 3450  $\text{cm}^{-1}$  (Fig. 1b) is allocated to the OH stretching frequency associated with Cl—OH of ChCl. The sharp peak around 1475  $\text{cm}^{-1}$  is associated with the N—C bond in ChCl and is a distinct feature for identifying ChCl. The OH stretching region of oxalic acid (Fig. 1c) contains broad overlapping bands centered around 3420  $\text{cm}^{-1}$  that is typical of carboxylic acid forming strongly bonded dimer rings through intermolecular H-bonding between C=O and O—H groups. The frequencies at 1720 and 1225  $\text{cm}^{-1}$  are related to C=O and C—O stretching frequency respectively and can be used to recognize free oxalic acid present in DES.

In the pure ChCl-OX, OH stretching frequency shifted to a lower frequency of 3415  $\text{cm}^{-1}$ , but retains its broader nature; in contrast, that of ChCl seems to disappear. C—O stretching frequency too is moved to a lower frequency at 1198  $\text{cm}^{-1}$ . ChCl-OX contains both the free and bound carbonyl groups- a sharp peak at 1710  $\text{cm}^{-1}$  indicates the presence of free COOH group in the DES and the presence of a peak at 1618  $\text{cm}^{-1}$  indicates the presence of OX in the dissolved state, but the relative strengths of these signals are dependent on the processing conditions. In the pure ChCl-OX, the latter peak appeared in a much faint signal compared to former. From the

spectroscopy data, it can be inferred that during the formation of DES, the strong Choline OH...Cl and COOH...COOH bonds in ChCl and OX break down to produce a new stronger intermolecular COOH...Cl bonds, which explains the stability of the liquid phase, lowering of melting point and high viscosity of the ChCl-OX. It is also suggested that multiple types of H bonds in form of OH (OX)—Cl<sup>-</sup>, OH (ChCl)—Cl<sup>-</sup> and OX—OX can be present in the resultant DES.

## 2. Enrichment factor

Enrichment factor (EF) is “a means of quantifying the enrichment of a potentially element in an environmental sample relative to a user-defined background composition”<sup>1</sup>. The EF was calculated as:

$$EF(\%) = C_{\text{sed}} \times V_{\text{sed}} / (C_0 \times V_{\text{aq}}) \times 100 \quad (1)$$

In which,  $C_{\text{sed}}$  is the final solutions after extraction of the standard Cr solutions obtained from the calibration graph,  $C_0$  is the Cr initial concentration within the sample,  $V_{\text{sed}}$  is the final volume of sediment phase and  $V_{\text{aq}}$  is the volume of the aqueous sample<sup>1</sup>.

## 3. Comparative study

The analytical characteristics of the present technique of PAHs analysis were compared with other microextraction techniques that were previously published. The results in Table S8 indicate that DES-HS-SDME approach provides LODs and EFs superior or comparable to other procedures. ChCl-OX DES was applied in this study as an extraction solvent. Thus, the proposed approach is a greener approach compared to the classical-DLLME, DLLME-MSFIA, and HLLME, which they all use toxic chlorine solvents as an extraction phase<sup>2-4</sup>. In this method, sample clean-up, and analyte pre-concentration were simultaneously achieved in a single step. The use of dispersive solvents is evident although relatively safer solvents have been used in

DLLME-SFO and SBSE-DLLME<sup>5, 6</sup>. While ionic liquids are classified as green solvents, their synthesis requires energy, special equipment, and it is time-consuming<sup>7, 8</sup>. Unlike AALLME, the proposed approach does not need any additional process or energy to disperse the extraction phase in solution and formation of the cloudy state<sup>9, 10</sup>. Compared with HLLME<sup>11</sup>, AG-LPME<sup>12</sup> and DES-HS-SDME is a centrifuge free procedure, and has extra electronic accessories compared with other microextraction techniques<sup>13, 14</sup>. In addition, thermal desorption system was avoided<sup>8, 12-14</sup>. Thus, it makes the proposed approach one step closer to automation. Further, sample preparation using SPME requires a particular costly device and is more time-consuming than DES-HS-SDME<sup>15, 16</sup>. In comparison with traditional SDME, using improved equipment and DES in the proposed method led to the high stability of the micro drop which allowed extraction in high temperatures and fast stirring rates without any operative problems<sup>11, 17</sup>. Moreover, collecting the extraction medium by micro-syringe after phase separation is a time-consuming and laborious step which is usually neglected in calculating analysis time. In the proposed method, using bell-shaped tube spends less time for this step. Therefore, compared to the time amounts reported in other studies, authors claim that DES-HS-SDME is one of the fastest procedures by considering the analysis time including the duration of extraction, centrifugation, and chromatography. Thus, DES-HS-SDME procedure is more cost-effective and environmentally friendly than the other methods presented in Table S5.

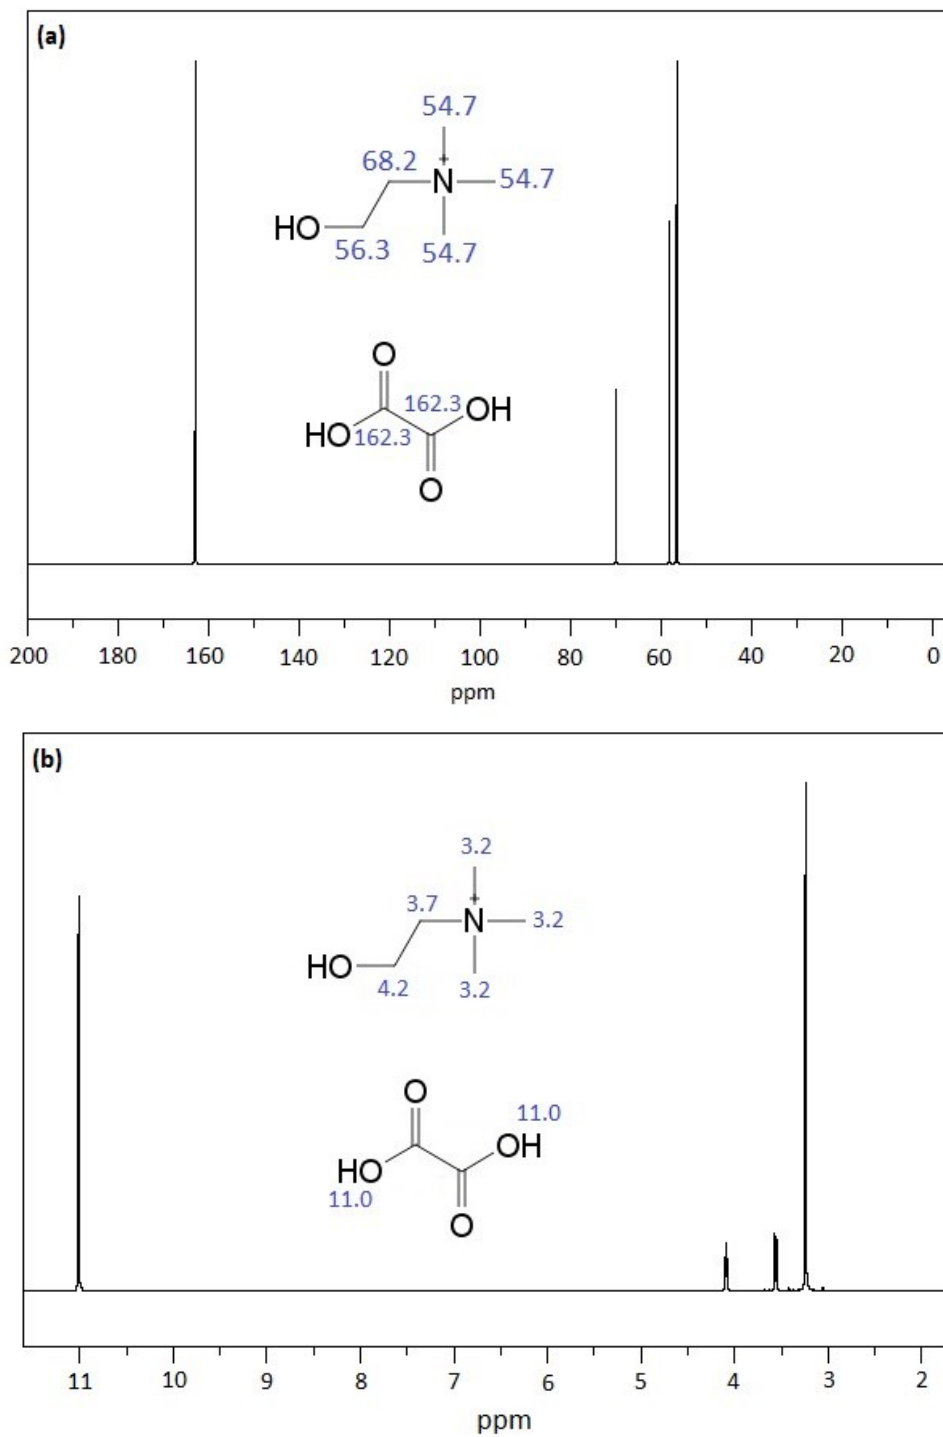

Fig. S1.  $^{13}\text{C}$  NMR spectrum (a) and  $^1\text{H}$  NMR spectrum (b) of DES (ChCl-Ox) in  $\text{D}_2\text{O}$ .

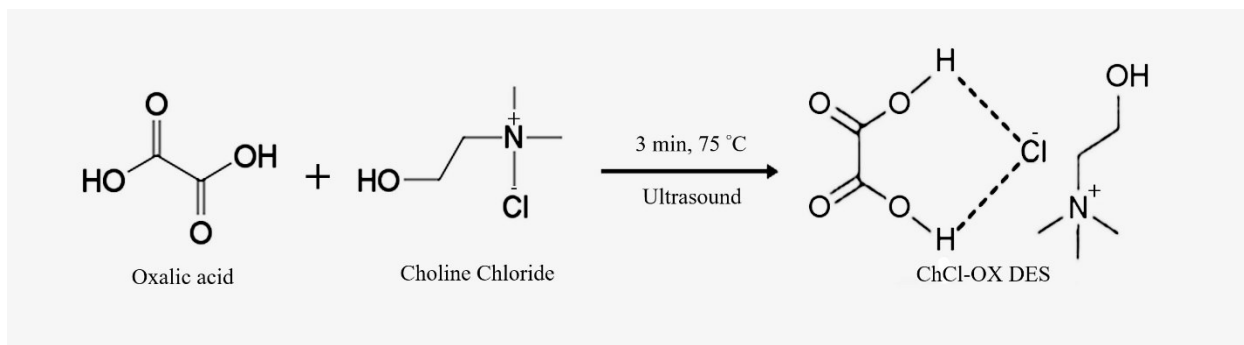

Fig. S2. Chemical structures of compounds and their interactions used to make ChCl-OX DES.

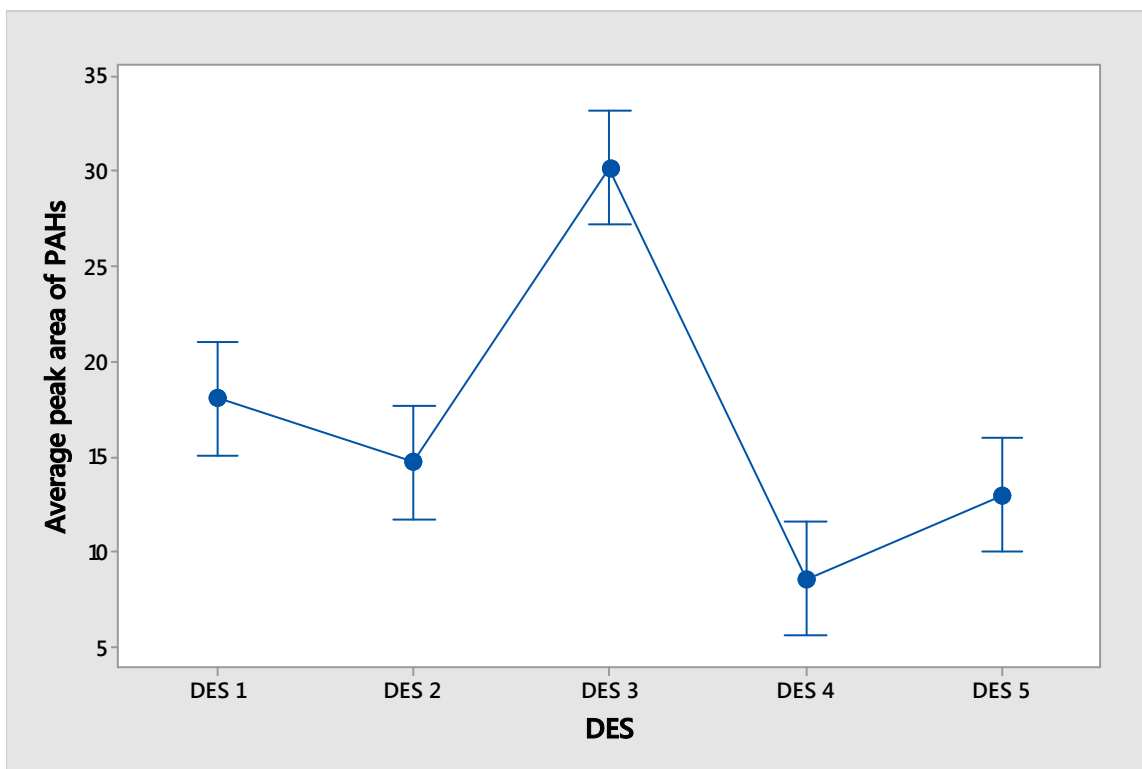

Fig. S3. Interval plot average peak area of PAHs versus DESs at  $p = 0.05$ . The pooled standard deviation was used to calculate the intervals.

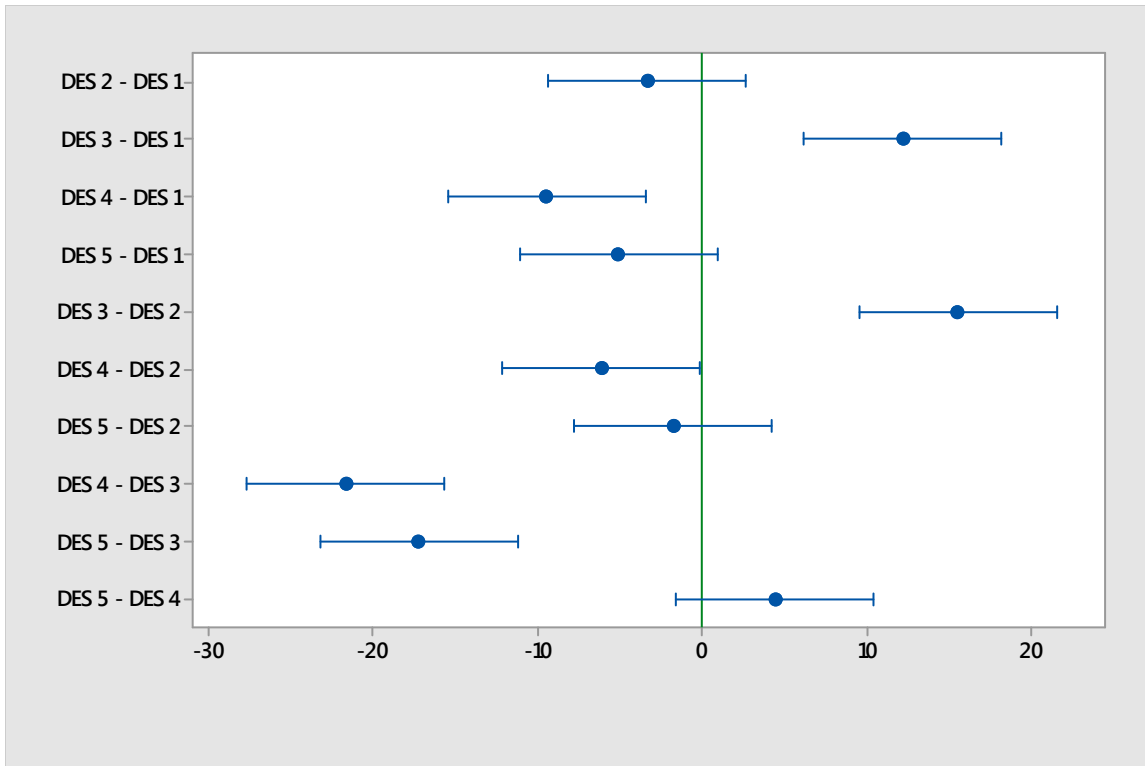

Fig. S4. Tukey Simultaneous 95% CIs, differences of means for DESs. If an interval does not contain zero, the corresponding means are significantly different.

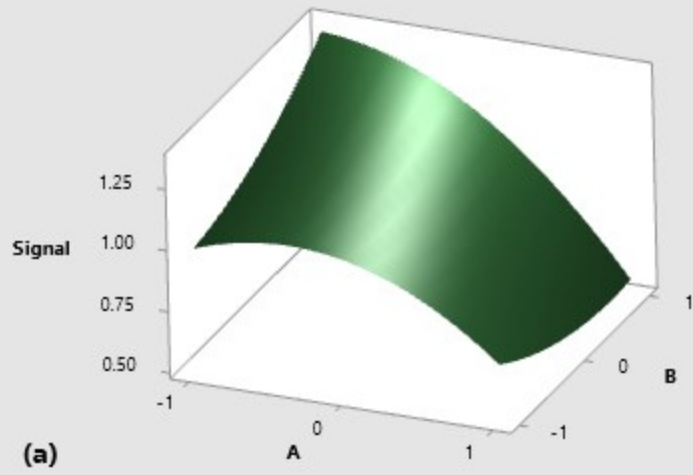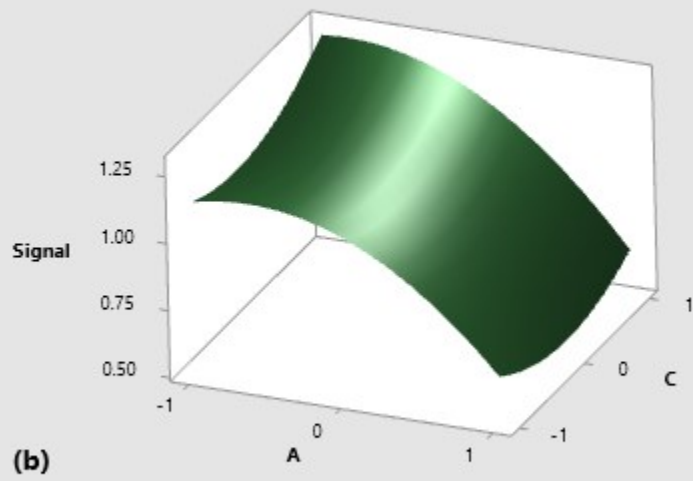



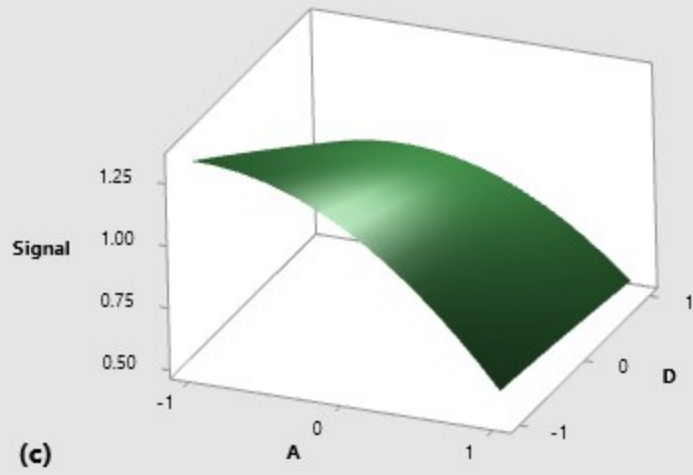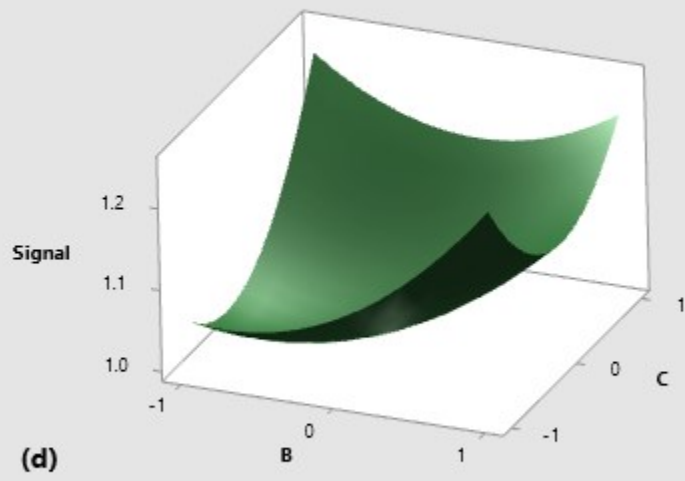

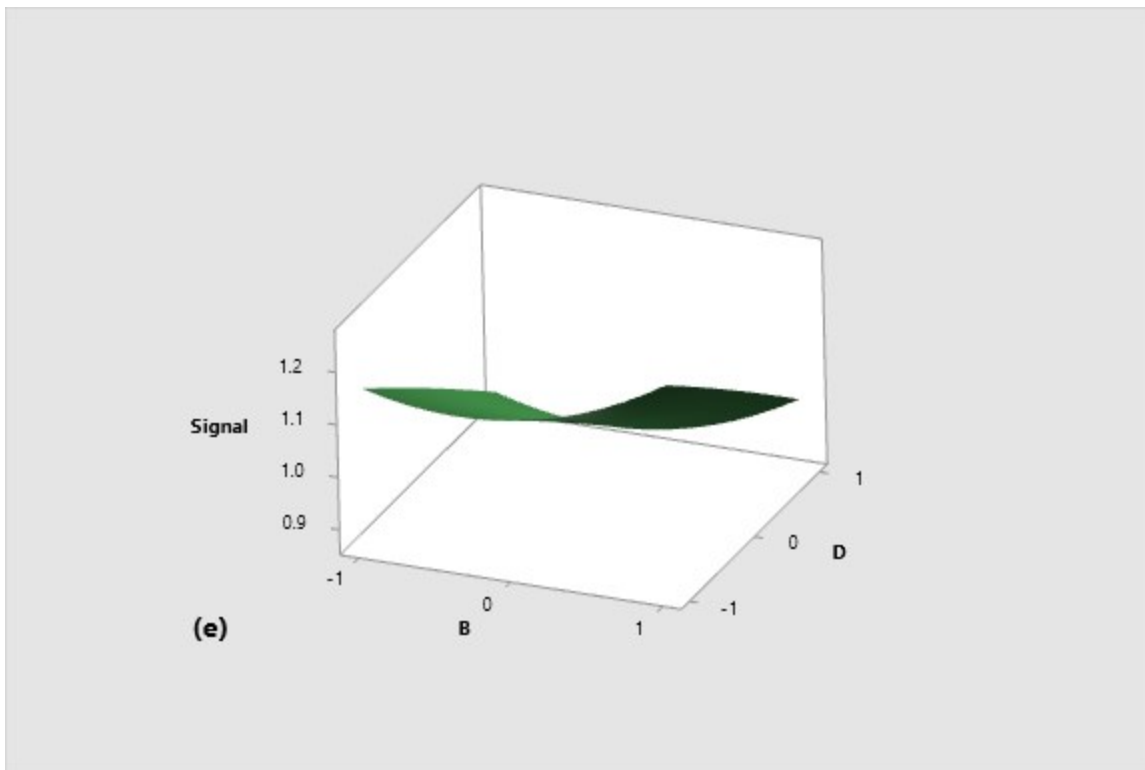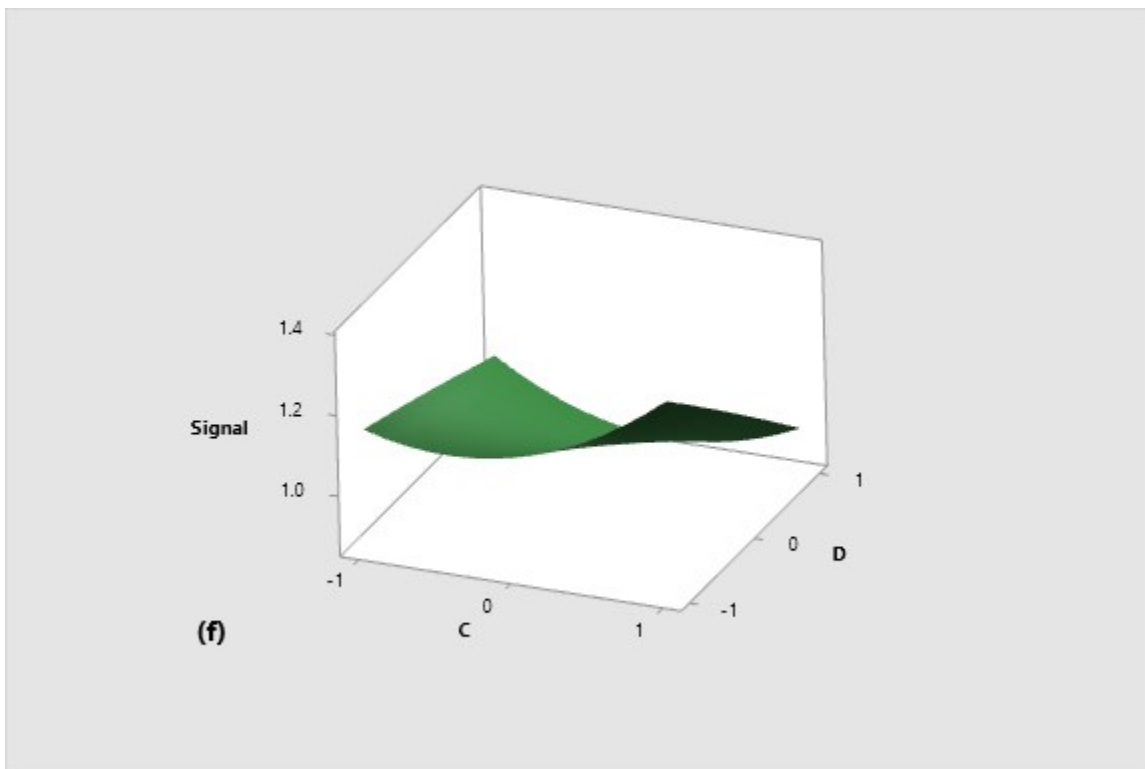

Fig. S5. Response surface plots on the sum of the peak area of PAHs as affected by the sample temperature (A), extraction time (B), stirring rate (C), and ionic strength (D).

Table S1. Mass parameters of SIM methods.

| Compound   | Molecular Structure                                                                 | <sup>a</sup> t <sub>r</sub> (min) | CAS Number | Target ion in SIM (m/z) | Dwell time (ms) |
|------------|-------------------------------------------------------------------------------------|-----------------------------------|------------|-------------------------|-----------------|
| <b>Nap</b> |    | 6.88                              | 91-20-3    | 128.00                  | 50              |
|            |                                                                                     |                                   |            | 127.00                  | 50              |
| <b>Acy</b> |    | 9.14                              | 208-96-8   | 152.00                  | 50              |
|            |                                                                                     |                                   |            | 151.00                  | 50              |
| <b>Ace</b> |    | 9.38                              | 83-32-9    | 154.00                  | 50              |
|            |                                                                                     |                                   |            | 153.00                  | 50              |
| <b>Flu</b> |    | 10.09                             | 86-73-7    | 166.05                  | 50              |
|            |                                                                                     |                                   |            | 165.05                  | 50              |
| <b>Ant</b> |    | 11.48                             | 120-12-7   | 178.05                  | 50              |
| <b>Phe</b> |    | 11.62                             | 85-01-8    | 178.05                  | 50              |
|            |                                                                                     |                                   |            | 176.05                  | 50              |
| <b>Flt</b> |    | 13.16                             | 85-01-8    | 202.05                  | 50              |
|            |                                                                                     |                                   |            | 200.05                  | 50              |
| <b>Pyr</b> |    | 13.67                             | 129-00-0   | 202.05                  | 50              |
|            |                                                                                     |                                   |            | 200.05                  | 50              |
| <b>BaA</b> |    | 15.24                             | 56-55-3    | 228.10                  | 50              |
|            |                                                                                     |                                   |            | 226.10                  | 50              |
| <b>Chr</b> |   | 15.37                             | 218-01-9   | 228.10                  | 50              |
|            |                                                                                     |                                   |            | 226.05                  | 50              |
| <b>BbF</b> |  | 16.85                             | 205-99-2   | 252.10                  | 50              |
|            |                                                                                     |                                   |            | 250.05                  | 50              |
| <b>BkF</b> |  | 17.01                             | 207-08-9   | 252.10                  | 50              |
|            |                                                                                     |                                   |            | 253.00                  | 50              |
| <b>BaP</b> |  | 18.15                             | 50-32-8    | 252.00                  | 50              |
|            |                                                                                     |                                   |            | 253.10                  | 50              |
| <b>Ind</b> |  | 20.43                             | 193-39-5   | 276.05                  | 50              |
| <b>DBA</b> |  | 20.65                             | 53-70-3    | 278.00                  | 40              |
| <b>BgP</b> |  | 21.77                             | 191-24-2   | 276.05                  | 50              |
|            |                                                                                     |                                   |            | 138.00                  | 50              |

Table S2. Analysis of Variance (ANOVA) for one-way analysis of DES type.

| Source | DF | Adj SS | Adj MS | F-Value | P-Value |
|--------|----|--------|--------|---------|---------|
| DES    | 4  | 1611.7 | 402.94 | 42.01   | 0.000   |
| Error  | 25 | 314.7  | 12.59  |         |         |
| Total  | 29 | 1926.4 |        |         |         |

Table S3. Experimental variables, levels, design matrix and results (total peak area) in the Box-Behnken design.

| Variables                   |       | Coded | Levels   |            |           |    |                      |
|-----------------------------|-------|-------|----------|------------|-----------|----|----------------------|
|                             |       |       | Low (-1) | Center (0) | High (+1) |    |                      |
| Extraction temperature (°C) |       | A     | 45       | 55         | 65        |    |                      |
| Extraction time (min)       |       | B     | 2        | 4          | 6         |    |                      |
| Stirring rate (rpm)         |       | C     | 1000     | 1500       | 2000      |    |                      |
| Ionic strength (%)          |       | D     | 10       | 15         | 20        |    |                      |
| Run                         | Order | Block | A        | B          | C         | D  | Total peak area (AU) |
| 27                          | 1     | 1     | 0        | 0          | 0         | 0  | 153450               |
| 12                          | 2     | 1     | 1        | 0          | 0         | 1  | 97650                |
| 2                           | 3     | 1     | 1        | -1         | 0         | 0  | 97650                |
| 9                           | 4     | 1     | -1       | 0          | 0         | -1 | 192200               |
| 1                           | 5     | 1     | -1       | -1         | 0         | 0  | 142600               |
| 8                           | 6     | 1     | 0        | 0          | 1         | 1  | 150350               |
| 23                          | 7     | 1     | 0        | -1         | 0         | 1  | 150350               |
| 11                          | 8     | 1     | -1       | 0          | 0         | 1  | 134850               |
| 14                          | 9     | 1     | 0        | 1          | -1        | 0  | 206150               |
| 6                           | 10    | 1     | 0        | 0          | 1         | -1 | 213900               |
| 13                          | 11    | 1     | 0        | -1         | -1        | 0  | 165850               |
| 5                           | 12    | 1     | 0        | 0          | -1        | -1 | 170500               |
| 4                           | 13    | 1     | 1        | 1          | 0         | 0  | 86800                |
| 20                          | 14    | 1     | 1        | 0          | 1         | 0  | 91450                |
| 22                          | 15    | 1     | 0        | 1          | 0         | -1 | 186000               |
| 15                          | 16    | 1     | 0        | -1         | 1         | 0  | 182900               |
| 7                           | 17    | 1     | 0        | 0          | -1        | 1  | 145700               |
| 24                          | 18    | 1     | 0        | 1          | 0         | 1  | 134850               |
| 25                          | 19    | 1     | 0        | 0          | 0         | 0  | 158100               |
| 21                          | 20    | 1     | 0        | -1         | 0         | -1 | 198400               |
| 10                          | 21    | 1     | 1        | 0          | 0         | -1 | 97650                |
| 16                          | 22    | 1     | 0        | 1          | 1         | 0  | 190650               |
| 3                           | 23    | 1     | -1       | 1          | 0         | 0  | 215450               |
| 17                          | 24    | 1     | -1       | 0          | -1        | 0  | 187550               |
| 26                          | 25    | 1     | 0        | 0          | 0         | 0  | 161200               |
| 18                          | 26    | 1     | 1        | 0          | -1        | 0  | 97650                |
| 19                          | 27    | 1     | -1       | 0          | 1         | 0  | 204600               |

Table S4. Analysis of variance for the fitted quadratic polynomial model of the proposed method.

| <b>Source</b>     | <b>DF</b> | <b>SS</b> | <b>MS</b> | <b>F-value</b> | <b>P- value</b> |
|-------------------|-----------|-----------|-----------|----------------|-----------------|
| Model             | 14        | 1.67929   | 0.119949  | 13.78          | 0.000           |
| Regression        | 4         | 1.14065   | 0.285162  | 32.75          | 0.000           |
| A                 | 1         | 0.89653   | 0.896533  | 102.98         | 0.000           |
| B                 | 1         | 0.02341   | 0.023408  | 2.69           | 0.127           |
| C                 | 1         | 0.01267   | 0.012675  | 1.46           | 0.251           |
| D                 | 1         | 0.20803   | 0.208033  | 23.89          | 0.000           |
| Square            | 4         | 0.39914   | 0.099784  | 11.46          | 0.000           |
| A <sup>2</sup>    | 1         | 0.18584   | 0.185837  | 21.35          | 0.001           |
| B <sup>2</sup>    | 1         | 0.02225   | 0.022245  | 2.56           | 0.136           |
| C <sup>2</sup>    | 1         | 0.05833   | 0.058334  | 6.70           | 0.024           |
| D <sup>2</sup>    | 1         | 0.00009   | 0.000093  | 0.01           | 0.920           |
| 2-Way Interaction | 6         | 0.13950   | 0.023250  | 2.67           | 0.070           |
| A×B               | 1         | 0.07290   | 0.072900  | 8.37           | 0.013           |
| A×C               | 1         | 0.00563   | 0.005625  | 0.65           | 0.437           |
| A×D               | 1         | 0.03422   | 0.034225  | 3.93           | 0.071           |
| B×C               | 1         | 0.01102   | 0.011025  | 1.27           | 0.282           |
| B×D               | 1         | 0.00010   | 0.000100  | 0.01           | 0.916           |
| C×D               | 1         | 0.01562   | 0.015625  | 1.79           | 0.205           |
| Error             | 12        | 0.10447   | 0.008706  |                |                 |
| Lack of fit       | 10        | 0.10321   | 0.010321  | 16.30          | 0.059           |
| Pure error        | 2         | 0.00127   | 0.000633  |                |                 |
| Total             | 26        | 1.78376   |           |                |                 |

Table S5. Concentrations of PAHs determined in real water samples.

| Compound | Spiked<br>( $\mu\text{g L}^{-1}$ ) | Tap water                         |                          |             |                  | River water                       |                          |             |                  | Well water                        |                          |             |                  | Waste water                       |                          |             |                  |
|----------|------------------------------------|-----------------------------------|--------------------------|-------------|------------------|-----------------------------------|--------------------------|-------------|------------------|-----------------------------------|--------------------------|-------------|------------------|-----------------------------------|--------------------------|-------------|------------------|
|          |                                    | Found<br>( $\mu\text{g L}^{-1}$ ) | RR% ( $\pm$ SD)<br>(n=3) | Bias<br>(%) | $t_{\text{exp}}$ | Found<br>( $\mu\text{g L}^{-1}$ ) | RR% ( $\pm$ SD)<br>(n=3) | Bias<br>(%) | $t_{\text{exp}}$ | Found<br>( $\mu\text{g L}^{-1}$ ) | RR% ( $\pm$ SD)<br>(n=3) | Bias<br>(%) | $t_{\text{exp}}$ | Found<br>( $\mu\text{g L}^{-1}$ ) | RR% ( $\pm$ SD)<br>(n=3) | Bias<br>(%) | $t_{\text{exp}}$ |
| Nap      | 0                                  | Nd <sup>b</sup>                   | -                        | -           | 2.06             | Nd                                | -                        | -           | 2.23             | 5.41                              | -                        | -           | 1.98             | 9.53                              | -                        | -           | 1.57             |
|          | 5                                  | 4.98                              | 99.60 (0.81)             | -0.40       |                  | 4.82                              | 96.31 (0.42)             | -3.69       |                  | 9.96                              | 99.20 (1.24)             | -0.80       |                  | 14.41                             | 97.80 (0.74)             | -2.20       |                  |
|          | 10                                 | 9.81                              | 98.10 (0.21)             | -1.90       |                  | 9.60                              | 95.98 (0.48)             | -4.12       |                  | 14.91                             | 95.00 (0.93)             | -5.00       |                  | 19.80                             | 102.70 (1.21)            | 2.70        |                  |
|          | 15                                 | 15.89                             | 105.93 (1.09)            | 5.93        |                  | 14.72                             | 98.15 (0.61)             | -1.85       |                  | 20.14                             | 98.20 (0.67)             | -1.80       |                  | 24.65                             | 100.80 (0.76)            | 0.80        |                  |
| Acy      | 0                                  | Nd                                | -                        | -           | 1.44             | Nd                                | -                        | -           | 1.52             | Nd                                | -                        | -           | 1.07             | 84.60                             | -                        | -           | 2.11             |
|          | 5                                  | 5.04                              | 100.80 (0.92)            | 0.80        |                  | 4.86                              | 97.21 (0.52)             | -2.79       |                  | 4.86                              | 97.09 (0.91)             | -2.91       |                  | 89.80                             | 104.00 (0.95)            | 4.00        |                  |
|          | 10                                 | 9.68                              | 96.80 (0.56)             | -3.20       |                  | 9.93                              | 99.31 (1.07)             | -0.69       |                  | 10.01                             | 100.08 (1.12)            | 0.08        |                  | 94.58                             | 99.81 (0.81)             | -0.19       |                  |
|          | 15                                 | 15.34                             | 102.27 (0.29)            | 2.27        |                  | 15.20                             | 101.31 (0.91)            | 1.31        |                  | 14.89                             | 99.24 (0.64)             | -0.76       |                  | 99.12                             | 96.80 (0.69)             | -3.20       |                  |
| Ace      | 0                                  | Nd                                | -                        | -           | 1.19             | Nd                                | -                        | -           | 1.27             | 7.05                              | -                        | -           | 1.29             | Nd                                | -                        | -           | 1.02             |
|          | 5                                  | 5.09                              | 101.80 (1.03)            | 1.80        |                  | 4.89                              | 97.80 (0.49)             | -2.20       |                  | 11.99                             | 98.80 (1.03)             | -1.20       |                  | 5.01                              | 100.10 (0.63)            | 0.10        |                  |
|          | 10                                 | 10.12                             | 101.20 (0.82)            | 1.20        |                  | 9.75                              | 97.50 (0.98)             | -2.50       |                  | 17.12                             | 100.68 (0.82)            | 0.68        |                  | 10.13                             | 101.31 (0.86)            | 1.31        |                  |
|          | 15                                 | 14.86                             | 99.07 (1.12)             | -0.93       |                  | 15.16                             | 101.07 (0.91)            | 1.07        |                  | 21.53                             | 96.52 (1.12)             | -3.48       |                  | 14.60                             | 97.31 (1.32)             | -2.89       |                  |
| Flu      | 0                                  | Nd                                | -                        | -           | 1.95             | Nd                                | -                        | -           | 1.08             | 3.91                              | -                        | -           | 2.09             | 8.27                              | -                        | -           | 0.79             |
|          | 5                                  | 4.85                              | 97.00 (0.86)             | -3.00       |                  | 5.02                              | 100.40 (0.77)            | 0.40        |                  | 9.14                              | 104.61 (1.11)            | 4.61        |                  | 13.19                             | 98.31 (1.08)             | -2.69       |                  |
|          | 10                                 | 10.49                             | 104.90 (1.07)            | 4.90        |                  | 10.07                             | 100.70 (0.73)            | 0.70        |                  | 13.82                             | 99.07 (0.96)             | -0.93       |                  | 18.17                             | 99.01 (0.76)             | -0.99       |                  |
|          | 15                                 | 14.36                             | 95.73 (0.74)             | 4.27        |                  | 15.11                             | 100.73 (0.69)            | 0.73        |                  | 18.37                             | 96.37 (0.85)             | -3.63       |                  | 23.39                             | 100.83 (0.59)            | 0.83        |                  |
| Phe      | 0                                  | Nd                                | -                        | -           | 1.83             | Nd                                | -                        | -           | 1.86             | 2.64                              | -                        | -           | 1.11             | 20.44                             | -                        | -           | 2.26             |
|          | 5                                  | 5.12                              | 102.40 (0.66)            | 2.40        |                  | 5.06                              | 101.11 (0.52)            | 1.11        |                  | 7.56                              | 98.34 (1.06)             | -1.66       |                  | 25.61                             | 103.40 (0.66)            | 3.40        |                  |
|          | 10                                 | 9.68                              | 96.80 (1.10)             | -3.20       |                  | 10.40                             | 104.01 (1.13)            | 4.01        |                  | 12.72                             | 100.81 (0.59)            | 0.81        |                  | 31.10                             | 106.60 (0.84)            | 6.60        |                  |
|          | 15                                 | 15.35                             | 102.33 (0.91)            | 2.33        |                  | 14.73                             | 98.17 (0.61)             | -1.83       |                  | 17.93                             | 101.91 (0.99)            | 1.91        |                  | 32.22                             | 97.02 (0.79)             | -2.98       |                  |
| Ant      | 0                                  | Nd                                | -                        | -           | 2.26             | 0.81                              | -                        | -           | 1.58             | Nd                                | -                        | -           | 2.21             | 17.67                             | -                        | -           | 1.94             |
|          | 5                                  | 4.72                              | 94.40 (1.14)             | -5.60       |                  | 5.72                              | 98.21 (0.85)             | -1.89       |                  | 4.94                              | 98.82 (0.93)             | -1.18       |                  | 22.44                             | 95.40 (0.88)             | -3.60       |                  |
|          | 10                                 | 9.68                              | 96.80 (1.02)             | -3.20       |                  | 10.97                             | 101.60 (0.67)            | 1.60        |                  | 9.65                              | 96.53 (0.68)             | -3.47       |                  | 27.50                             | 98.30 (0.93)             | -1.70       |                  |
|          | 15                                 | 15.66                             | 104.40 (0.58)            | 4.40        |                  | 15.69                             | 99.20 (0.95)             | -0.80       |                  | 14.34                             | 95.61 (1.09)             | -4.39       |                  | 32.58                             | 99.41 (0.85)             | -0.59       |                  |
| Flt      | 0                                  | Nd                                | -                        | -           | 0.99             | Nd                                | -                        | -           | 1.07             | Nd                                | -                        | -           | 1.63             | 1.91                              | -                        | -           | 1.55             |
|          | 5                                  | 5.09                              | 101.80 (0.94)            | 1.80        |                  | 4.96                              | 99.21 (0.46)             | -0.79       |                  | 4.90                              | 97.91 (0.94)             | -2.09       |                  | 6.76                              | 97.06 (0.74)             | -2.94       |                  |
|          | 10                                 | 9.99                              | 99.90 (0.71)             | -0.10       |                  | 9.95                              | 99.53 (0.86)             | -0.47       |                  | 9.85                              | 98.51 (0.88)             | -1.49       |                  | 11.72                             | 98.14 (0.69)             | -1.86       |                  |
|          | 15                                 | 15.07                             | 100.47 (0.83)            | 0.47        |                  | 14.74                             | 98.28 (1.20)             | -1.72       |                  | 14.85                             | 99.02 (1.19)             | -0.98       |                  | 17.11                             | 101.35 (0.86)            | 1.35        |                  |
| Pyr      | 0                                  | Nd                                | -                        | -           | 1.81             | Nd                                | -                        | -           | 1.84             | 1.47                              | -                        | -           | 1.08             | 23.62                             | -                        | -           | 0.69             |
|          | 5                                  | 5.13                              | 102.60 (0.59)            | 2.60        |                  | 4.89                              | 97.80 (0.94)             | -2.20       |                  | 6.59                              | 102.35 (1.27)            | 2.35        |                  | 28.66                             | 100.80 (0.49)            | 0.80        |                  |
|          | 10                                 | 9.74                              | 97.40 (0.69)             | -2.60       |                  | 9.61                              | 96.12 (0.88)             | -3.88       |                  | 11.56                             | 100.94 (0.91)            | 0.94        |                  | 33.73                             | 101.10 (0.62)            | 1.10        |                  |
|          | 15                                 | 15.40                             | 102.67 (0.66)            | 2.67        |                  | 15.14                             | 100.93 (1.19)            | 0.93        |                  | 16.19                             | 98.16 (0.83)             | -1.84       |                  | 38.42                             | 98.66 (0.55)             | -1.44       |                  |
| BaA      | 0                                  | Nd                                | -                        | -           | 1.66             | Nd                                | -                        | -           | 2.10             | Nd                                | -                        | -           | 1.96             | Nd                                | -                        | -           | 1.44             |
|          | 5                                  | 4.89                              | 97.80 (1.07)             | -2.20       |                  | 4.79                              | 95.61 (1.52)             | -4.39       |                  | 4.80                              | 96.08 (0.69)             | -3.92       |                  | 4.97                              | 99.40 (1.11)             | -0.60       |                  |
|          | 10                                 | 10.16                             | 101.60 (0.91)            | 1.60        |                  | 9.82                              | 98.20 (1.06)             | -1.80       |                  | 9.81                              | 98.11 (1.08)             | -1.89       |                  | 9.62                              | 96.20 (0.81)             | -3.80       |                  |
|          | 15                                 | 15.32                             | 102.13 (0.86)            | 2.13        |                  | 14.58                             | 97.19 (0.75)             | -2.81       |                  | 15.12                             | 100.83 (0.87)            | 0.83        |                  | 15.64                             | 104.27 (0.97)            | 4.27        |                  |

|            |    |       |               |       |      |       |               |       |      |       |               |       |      |       |               |       |      |
|------------|----|-------|---------------|-------|------|-------|---------------|-------|------|-------|---------------|-------|------|-------|---------------|-------|------|
| <b>Chr</b> | 0  | Nd    | -             | -     | 1.38 | Nd    | -             | -     | 2.22 | 0.92  | -             | -     | 1.27 | Nd    | -             | -     | 1.74 |
|            | 5  | 4.89  | 97.80 (0.93)  | -2.20 |      | 5.20  | 104.04 (0.91) | 4.04  |      | 6.02  | 102.07 (1.12) | 2.07  |      | 4.95  | 99.04 (0.39)  | -0.96 |      |
|            | 10 | 9.75  | 97.50 (0.94)  | -2.50 |      | 9.61  | 96.12 (0.81)  | -3.88 |      | 10.82 | 99.04 (0.91)  | -0.96 |      | 9.49  | 94.88 (1.27)  | -3.12 |      |
|            | 15 | 15.16 | 101.07 (0.78) | 1.07  |      | 14.54 | 96.91 (0.59)  | -3.09 |      | 15.56 | 97.61 (0.77)  | -2.39 |      | 14.55 | 97.01 (0.94)  | -2.99 |      |
| <b>BbF</b> | 0  | Nd    | -             | -     | 0.67 | Nd    | -             | -     | 1.49 | Nd    | -             | -     | 1.35 | Nd    | -             | -     | 1.89 |
|            | 5  | 5.02  | 100.40 (0.66) | 0.40  |      | 5.01  | 100.10 (0.63) | 0.10  |      | 4.87  | 97.35 (1.08)  | -2.65 |      | 5.05  | 100.98 (0.84) | 0.98  |      |
|            | 10 | 10.07 | 100.70 (0.73) | 0.70  |      | 10.13 | 101.31 (0.86) | 1.31  |      | 9.86  | 98.64 (0.67)  | -1.36 |      | 9.63  | 96.33 (0.69)  | -3.67 |      |
|            | 15 | 15.11 | 100.73 (0.86) | 0.73  |      | 14.60 | 97.31 (1.32)  | -2.69 |      | 14.90 | 99.34 (0.89)  | -0.66 |      | 14.71 | 98.07 (0.99)  | -1.93 |      |
| <b>BkF</b> | 0  | Nd    | -             | -     | 1.15 | Nd    | -             | -     | 1.15 | Nd    | -             | -     | 1.06 | Nd    | -             | -     | 1.52 |
|            | 5  | 5.19  | 103.80 (1.12) | 3.8   |      | 4.95  | 99.07 (0.76)  | -0.93 |      | 4.89  | 97.81 (0.94)  | -2.19 |      | 4.89  | 97.80 (0.86)  | -2.20 |      |
|            | 10 | 9.94  | 99.40 (0.94)  | -0.60 |      | 9.62  | 96.16 (1.52)  | -3.84 |      | 9.90  | 99.04 (0.83)  | -0.66 |      | 9.75  | 97.50 (0.77)  | -2.50 |      |
|            | 15 | 15.20 | 101.33 (0.88) | 1.33  |      | 15.29 | 101.94 (1.29) | 1.94  |      | 15.02 | 100.12 (1.08) | 0.12  |      | 15.16 | 101.07 (0.92) | 1.07  |      |
| <b>BaP</b> | 0  | Nd    | -             | -     | 2.24 | Nd    | -             | -     | 1.09 | Nd    | -             | -     | 2.17 | Nd    | -             | -     | 1.05 |
|            | 5  | 5.21  | 104.20 (0.64) | 4.20  |      | 4.91  | 98.14 (0.83)  | -1.86 |      | 5.25  | 105.08 (0.94) | 5.08  |      | 4.82  | 96.44 (0.78)  | -3.56 |      |
|            | 10 | 9.64  | 96.40 (0.99)  | -3.60 |      | 9.94  | 99.37 (1.04)  | -0.63 |      | 10.13 | 101.32 (0.67) | 1.32  |      | 9.86  | 98.61 (0.76)  | -1.39 |      |
|            | 15 | 15.38 | 102.53 (0.85) | 2.53  |      | 14.71 | 98.05 (0.95)  | -1.95 |      | 14.79 | 98.61 (1.11)  | -1.39 |      | 15.24 | 101.62 (1.06) | 1.62  |      |
| <b>DBA</b> | 0  | Nd    | -             | -     | 1.97 | Nd    | -             | -     | 1.18 | Nd    | -             | -     | 2.26 | Nd    | -             | -     | 1.45 |
|            | 5  | 4.87  | 97.40 (1.14)  | -3.60 |      | 5.06  | 101.14 (0.83) | 1.14  |      | 4.75  | 94.89 (1.09)  | -5.11 |      | 4.86  | 97.09 (0.84)  | -3.91 |      |
|            | 10 | 9.76  | 97.60 (0.97)  | -3.40 |      | 9.94  | 99.43 (1.04)  | -0.57 |      | 9.80  | 98.04 (0.67)  | -1.96 |      | 10.24 | 102.37 (0.93) | 2.37  |      |
|            | 15 | 15.08 | 100.53 (0.83) | 0.53  |      | 15.16 | 101.05 (0.95) | 1.05  |      | 15.24 | 101.60 (0.83) | 1.60  |      | 15.30 | 101.97 (1.04) | 1.97  |      |
| <b>BgP</b> | 0  | Nd    | -             | -     | 1.83 | Nd    | -             | -     | 1.84 | Nd    | -             | -     | 1.09 | Nd    | -             | -     | 1.29 |
|            | 5  | 4.97  | 99.40 (0.75)  | -0.60 |      | 4.89  | 97.82 (0.46)  | -2.18 |      | 5.03  | 100.62 (0.88) | 0.62  |      | 5.16  | 103.17 (0.66) | 3.17  |      |
|            | 10 | 9.62  | 96.20 (0.91)  | -3.80 |      | 9.95  | 99.53 (0.86)  | -0.47 |      | 9.93  | 99.34 (1.04)  | -0.66 |      | 10.08 | 100.83 (0.71) | 0.83  |      |
|            | 15 | 15.64 | 104.27 (1.07) | 4.27  |      | 15.54 | 103.61 (1.20) | 3.61  |      | 14.71 | 98.06 (0.58)  | -1.94 |      | 14.80 | 98.67 (0.90)  | -1.23 |      |
| <b>Ind</b> | 0  | Nd    | -             | -     | 2.29 | Nd    | -             | -     | 2.08 | Nd    | -             | -     | 1.88 | Nd    | -             | -     | 1.03 |
|            | 5  | 4.86  | 97.20 (0.58)  | -2.80 |      | 4.89  | 97.80 (0.94)  | -2.20 |      | 5.15  | 103.06 (0.79) | 3.06  |      | 5.21  | 104.16 (0.55) | 4.16  |      |
|            | 10 | 9.54  | 95.40 (0.67)  | -4.60 |      | 9.82  | 98.16 (0.88)  | -1.84 |      | 9.86  | 98.64 (1.07)  | -1.36 |      | 9.78  | 97.83 (0.80)  | -2.17 |      |
|            | 15 | 14.27 | 95.13 (0.93)  | -4.87 |      | 15.21 | 101.39 (1.19) | 1.39  |      | 14.79 | 98.60 (0.71)  | -1.40 |      | 15.10 | 100.64 (0.73) | 0.64  |      |

<sup>a</sup> $t_{(0.025, 8)}=2.30$ . <sup>b</sup> Not detected.

Table S6. Comparison of the characteristics of microextraction procedure and its varieties for analysis of PAHs with the proposed method in this study.

| Analytical method                  | Number of PAHs | LOD ( $\mu\text{g L}^{-1}$ ) | EF <sup>a</sup> | ES <sup>b</sup>                       | Sample size (mL) | Analysis Time (min) <sup>c</sup> | Extraction Time (min) | Ref. |
|------------------------------------|----------------|------------------------------|-----------------|---------------------------------------|------------------|----------------------------------|-----------------------|------|
| DLLME <sup>d</sup> -GC-FID         | 16             | 0.007-0.020                  | 603-1113        | C <sub>2</sub> Cl <sub>4</sub>        | 5                | ≈ 38                             | <1                    | [2]  |
| DLLME-MSFIA <sup>e</sup> -LC-FLD   | 15             | 0.02-0.60                    | 86-95           | Trichloroethylene                     | 4                | ≈ 27                             | <1                    | [3]  |
| HLLME <sup>f</sup> -GC-FID         | 9              | 0.02-0.18                    | 225-257         | CHCl <sub>3</sub> -CH <sub>3</sub> OH | 2.5              | ≈ 46                             | <1                    | [4]  |
| DLLME-SFO <sup>g</sup> -LC         | 5              | 0.045-0.86                   | 67-104          | 1-undecanol                           | 10               | ≈ 27                             | <1                    | [5]  |
| SBSE <sup>h</sup> -DLLME-SFO-LC-UV | 5              | 0.007-0.010                  | 1630-2637       | 1-undecanol                           | 100              | ≈ 75                             | 55                    | [6]  |
| IL <sup>i</sup> -DLLME-LC-FLD/UV   | 16             | 0.02-0.56                    | 109-228         | IL                                    | 5                | ≈ 70                             | 10                    | [7]  |
| SBDLME <sup>j</sup> -GC-MS         | 9              | 0.0005-0.0087                | 18-717          | MIL <sup>k</sup>                      | 25               | ≈ 40 <sup>†</sup>                | 10                    | [8]  |
| TC-IL <sup>l</sup> -DLLME-LC-UV    | 16             | 0.0005-0.88                  | -**             | IL <sup>i</sup>                       | 10               | ≈ 100                            | 30                    | [9]  |
| AALLME <sup>m</sup> -LC-UV         | 5              | 0.04-0.60                    | 114-156         | 1-dodecanol                           | 10               | ≈ 25                             | <6                    | [10] |
| HS-SDME <sup>n</sup> -LC-FLD       | 5              | 0.004-0.247                  | 18-53           | β-cyclodextrin                        | 10               | ≈ 22                             | 10                    | [11] |
| AG-LPME <sup>r</sup> -GC-MS        | 4              | 0.009-0.014                  | 89-177          | 1-octanol                             | 10               | ≈ 68                             | 50                    | [12] |
| AA <sup>m</sup> -DLLME-LC-UV       | 5              | 0.002-0.8                    | 310-325         | 2-ethyl-1-hexanol                     | 40               | ≈ 36                             | <1                    | [13] |
| SFO <sup>g</sup> -GC-FID           | 12             | 0.07-1.67                    | 35-60           | 1-undecanol                           | 8                | ≈ 60                             | 35                    | [14] |
| In-tube-SPME <sup>s</sup> -LC-UV   | 10             | 0.001-0.01                   | 268-2497        | -*                                    | 60               | ≈ 86                             | 60*                   | [15] |
| HS-SPME <sup>t</sup> -GC-FID       | 8              | 0.02-0.09                    | -**             | -*                                    | 10               | ≈ 67                             | 45                    | [16] |
| ELLME-DES <sup>o</sup> -LC-UV      | 7              | 0.02-6.8                     | 151-170         | DES <sup>p</sup>                      | 1.5              | ≈ 60                             | 20                    | [17] |
| USA <sup>u</sup> -DLLME- GC-MS     | 21             | 0.004-0.01                   | -**             | DES <sup>v</sup>                      | 10               | ≈ 75                             | <20                   | [18] |
| MSPE <sup>q</sup> -LC-UV           | 5              | 0.02-0.1                     | 242-600         | -*                                    | 2.0              | ≈ 37                             | 20*                   | [19] |
| Proposed method                    | 16             | 0.01-0.14                    |                 | DES <sup>w</sup>                      | 10               | ≈ 60                             | <8                    | -    |

<sup>a</sup>Enrichment factor; <sup>b</sup> Extraction solvent; <sup>c</sup> Analysis time including extraction time, centrifugation time, and chromatography run time; <sup>d</sup> Dispersive liquid-liquid microextraction; <sup>e</sup>Multi syringe flow injection analysis; <sup>f</sup>Homogeneous liquid-liquid microextraction; <sup>g</sup> Solidification of floating organic drop; <sup>h</sup> Stir bar sorptive extraction; <sup>i</sup>Ionic liquid; <sup>j</sup>Stir bar dispersive liquid microextraction; <sup>k</sup> Magnetic ionic liquid; <sup>l</sup>Temperature-controlled ionic liquid dispersive liquid-liquid microextraction; <sup>m</sup>Air assisted liquid liquid microextraction; <sup>n</sup> Headspace-single drop microextraction; <sup>o</sup>Emulsification liquid-liquid microextraction based on deep eutectic solvent; <sup>p</sup>Deep eutectic solvent, choline chloride-phenol[ChCl][Ph], 1:2; <sup>q</sup>Magnetic solid phase extraction; <sup>r</sup> Agarose gel disc-liquid phase microextraction; <sup>s</sup>In tube solid phase microextraction; <sup>t</sup>Head space-solid phase microextraction; <sup>u</sup>Ultrasoundassisted; <sup>v</sup> Deep eutectic solvent thymol-conphor[Th][C], 1:1; <sup>w</sup> Deep eutectic solvent, choline chloride-oxalic acid[ChCl][OX], 1:2; \* Not used; <sup>†</sup> Thermal desorption system was used; \*\* Not reported; \* Solvent desorption (ACN) was used; \* Solvent desorption (1-propanol) was used.





## REFERENCES

- 1 R.C. Bern, K. Walton-Day and L.D. Naftz, Improved enrichment factor calculations through principal component analysis: Examples from soils near breccia pipe uranium mines, *Environ. Pollut.*, 2019, **248**, 90-100.
- 2 M. Rezaee, Y. Assadi, M. R. Millani Hosseini, E. Aghae, F. Ahmadi and S. Berijani, Determination of organic compounds in water using dispersive liquid–liquid microextraction, *J. Chromatogr. A*, 2006, **1116**, 1-9.
- 3 M. Fernández, S. Clavijo, R. Forteza and V. Cerdà, Determination of polycyclic aromatic hydrocarbons using lab on valve dispersive liquid–liquid microextraction coupled to high performance chromatography, *Talanta*, 2015, **138**, 190-195.
- 4 L. Tavakoli, Y. Yamini, H. Ebrahimzadeh and S. Shariati, Homogeneous liquid-liquid extraction for preconcentration of polycyclic aromatic hydrocarbons using a water/methanol/chloroform ternary component system, *J. Chromatogr. A*, 2008, **1196-1197**, 133-138.
- 5 H. Xu, Z. Ding, L.Lv, D. Song and Y.Q. Feng, A novel dispersive liquid–liquid microextraction based on solidification of floating organic droplet method for determination of polycyclic aromatic hydrocarbons in aqueous samples, *Anal. Chim. Acta*, 2009, **636**, 28–33.
- 6 M. Shamsipur and B. Hashemi, Extraction and determination of polycyclic aromatic hydrocarbons in water samples using stir bar sorptive extraction (SBSE) combined with dispersive liquid–liquid microextraction based on the solidification of floating organic drop (DLLME-SFO) followed by HPLC-UV, *RSC Adv.*, 2015, **26**, 20339-20345.
- 7 G.S. Medina and R. Mario, Development of a dispersive liquid–liquid microextraction method using a lighter-than-water ionic liquid for the analysis of polycyclic aromatic hydrocarbons in water, *J. Sep. Sci.*, 2016, **39**, 4209–4218.
- 8 J.L. Benedé, J.L. Anderson and A. Chisvert, Trace determination of volatile polycyclic aromatic hydrocarbons in natural waters by magnetic ionic liquid-based stir bar dispersive liquid microextraction, *Talanta*, 2018, **176**, 253-261.
- 9 Q. Zhou and Y. Gao, Determination of polycyclic aromatic hydrocarbons in water samples by temperature-controlled ionic liquid dispersive liquid–liquid microextraction combined with high performance liquid chromatography, *Anal. Methods*, 2014, **8**, 2553-2559.
- 10 S. Arghavani-Beydokhti, M. Rajabi, M. Bazregar and A. Asghari, Centrifuge-free dispersive liquid-liquid microextraction based on the salting-out effect followed by high performance liquid chromatography for simple and sensitive determination of polycyclic aromatic hydrocarbons in water samples, *Anal. Methods*, 2017, **9**, 1732-1740.
- 11 Y. Wu, L. Xia, R. Chen and B. Hu, Headspace single drop microextraction combined with HPLC for the determination of trace polycyclic aromatic hydrocarbons in environmental samples, *Talanta*, 2008, **74**, 470-477.

- 12 S.H. Loh, M.M. Sanagi, W.A.W. Ibrahim and M.N. Hasan, Solvent-impregnated agarose gel liquid phase microextraction of polycyclic aromatic hydrocarbons in water, *J. Chromatogr. A*, 2013, **1302**, 14-19.
- 13 M.H. Fatemi, M.R. Hadjmohammadi, P. Shakeri and P. Biparva, Extraction optimization of polycyclic aromatic hydrocarbons by alcoholic-assisted dispersive liquid-liquid microextraction and their determination by HPLC, *J. Sep. Sci.*, 2013, **35**, 86-92.
- 14 M.R. Khalili-Zanjanim, Y. Yamini, S. Shariati and A. Jonsson, A new liquid-phase microextraction method based on solidification of floating organic drop, *Anal. Chim. Acta*, 2007, **585**, 286–293.
- 15 M. Sun, J. Feng, Y. Bu and C. Luo, Highly sensitive copper fiber-in-tube solid-phase microextraction for online selective analysis of polycyclic aromatic hydrocarbons coupled with high performance liquid chromatography, *J. Chromatogr. A*, 2015, **1408**, 41-48.
- 16 M. Behzadi, E. Noroozian and M. Mirzaei, A novel coating based on carbon nanotubes/poly-ortho-phenylenediamine composite for headspace solid-phase microextraction of polycyclic aromatic hydrocarbons, *Talanta*, 2013, **108**, 66-73.
- 17 T. Khezeli, A. Daneshfar and R. Sahraei, Emulsification liquid–liquid microextraction based on deep eutectic solvent: An extraction method for the determination of benzene, toluene, ethylbenzene and seven polycyclic aromatic hydrocarbons from water samples, *J. Chromatogr. A*, 2015, **1425**, 25-33.
- 18 P. Makoś, A. Przyjazny and G. Boczkaj, Hydrophobic deep eutectic solvents as “green” extraction media for polycyclic aromatic hydrocarbons in aqueous samples, *J. Chromatogr. A*, 2018, **1570**, 28-37.
- 19 E. Tahmasebi and Y. Yamini, Facile synthesis of new nano sorbent for magnetic solid-phase extraction by self assembling of bis-(2,4,4-trimethyl pentyl)-dithiophosphinic acid on Fe<sub>3</sub>O<sub>4</sub>@Ag core@shell nanoparticles: Characterization and application, *Anal. Chim. Acta*, 2013, **756**, 13-22.
